# Supplementary material for: Centriolar satellites are required for efficient ciliogenesis and ciliary content regulation
Source: PubMed Central journal article supplement (PMC6549029; doi:10.15252/embr.201947723), 2019-04-25
Supplement: EMBR-20-e47723-s001.pdf [file EMBR-20-e47723-s001.pdf]

## **Table of Contents**

**Appendix Figure S1. Expression of myc-PCM1 in IMCD3 PCM1 KO cells**

# Appendix Figure S1

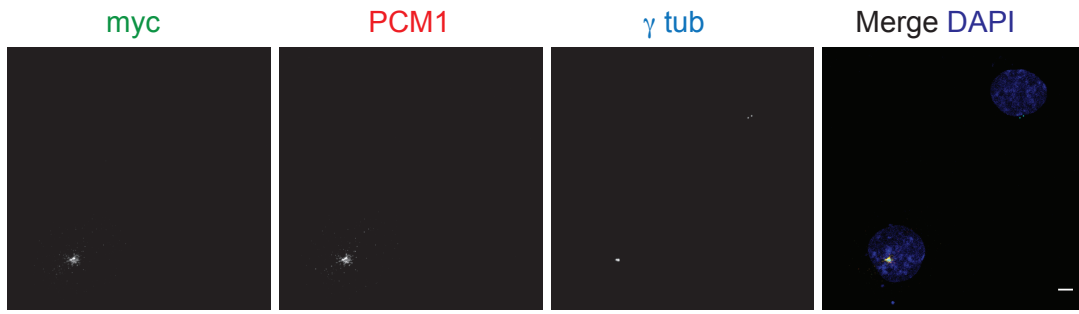

**Appendix Figure S1. Expression of myc-PCM1 in IMCD3 PCM1 KO cells**

Control and IMCD3 KO cells were transfected with myc-BirA\*-PCM1, fixed and stained with antibodies against myc, PCM1, gamma-tubulin. DNA was stained with DAPI. Scale bar, 5  $\mu$ m.
